# Supplementary material
Source: publisher figshare collection journal article supplement (https://acs.figshare.com/ndownloader/files/25566669)
Supplement: Supplementary file 1 [file 25566669]

# Supporting Information

## Hybrid Architecture of Porous Polypyrrole Scaffold Loaded with Metal-Organic Frameworks for Flexible Solid-State Supercapacitor

Ting Yue,<sup>†</sup> Ruizuo Hou,<sup>†</sup> Xiaobang Liu,<sup>†</sup> Kai Qi,<sup>\*,†</sup> Zhenyu Chen,<sup>†</sup> Yubing Qiu,<sup>†</sup> Xingpeng Guo,<sup>‡</sup> and Bao Yu Xia<sup>†</sup>

<sup>†</sup> Key Laboratory of Material Chemistry for Energy Conversion and Storage (Ministry of Education), Hubei Key Laboratory of Material Chemistry and Service Failure, School of Chemistry and Chemical Engineering, Wuhan National Laboratory for Optoelectronics, Huazhong University of Science and Technology (HUST), 1037 Luoyu Road, Wuhan 430074, P. R. China

<sup>‡</sup> School of Chemistry and Chemical Engineering, Guangzhou University, Guangzhou, 510006, P. R. China

### Corresponding Authors

\*E-mail (K. Qi): [gikai@hust.edu.cn](mailto:gikai@hust.edu.cn)

## ■ Experimental Section

***Synthesis of three-dimensional porous PPy (p-PPy).*** The synthesis of p-PPy was established according to the procedure reported by Liu et al.<sup>1</sup> Pyrrole was distilled and kept refrigerated in the dark before use. 0.05 g of perfluorotetradecanoic acid (PFTA) was ultrasonically dispersed in 2 ml of ethanol for 15 minutes, and then 9 ml of water was added with magnetically stirring for 1 hour. 62  $\mu$ l of pyrrole monomer was added into the solution and vigorously stirred for 2 hours. Subsequently, 0.18 g of ammonium persulfate dissolved in 1 ml of deionized water was added dropwise to the above solution, and the solution gradually formed into a black jelly. After staying for 1 h, the above solution was placed in the lined stainless steel autoclaves at 150 °C for 8 h. The obtained gel was immersed in 500 ml of 1 M HCl/ethanol (1:1, v:v) for 5 days to exclude the PFTA template, and then soaked in DI water until the soaking solution is neutral. Final sample of p-PPy was obtained after freeze-drying.

***Synthesis of p-PPy scaffold loaded with Cu-CAT MOF (p-PPy/Cu-CAT).*** The preparation of Cu-CAT MOF was according to the report of Hmadeh et al.<sup>2</sup> Typically, copper acetate monohydrate (0.6 mmol, 120 mg) and 2, 3, 6, 7, 10, 11-hexahydroxytriphenylene (HHTP) (0.3 mmol, 97.5 mg) were added into the mixture solvent of water/DMF (v: v = 1:1) in a 20 mL glass vial. Subsequently, after vigorously stirring and ultrasonication for 20 min, the mixture solution was turned into dark. Then p-PPy was immersed into the above solution and heated in an oven at 85 °C for 6 h. After the reaction finished and the mixture cooled down to room temperature, the product was taken out and washed by DI water and DMF for several times in order to remove unreacted reactants and soluble impurities. The obtained p-PPy/Cu-CAT was immersed into acetone for 2 days at 80 °C accompanied with solvent-exchange, and then dried in a vacuum oven at 60 °C. Similarly, Cu-CAT powders were synthesized by the same procedure just without the addition of p-PPy.

***Preparation of the flexible p-PPy/Cu-CAT electrodes.*** The p-PPy/Cu-CAT electrode was prepared by the traditional slurry coating method. The active materials were mixed with polyvinylidene fluoride and

conductive carbon (80:10:10, w/w/w) in N-methyl-2-pyrrolidene solution by stirring into a sticky slurry. Then the slurry was coated onto the carbon cloth and dried at 50 °C overnight under vacuum. The mass loading of p-PPy/Cu-CAT is about 2.8 mg cm<sup>-2</sup>. Both the electrodes of active material p-PPy and Cu-CAT with the same mass loading are respectively assembled by the similar method.

***Assembly of symmetric flexible all-solid-state supercapacitor.*** The gel electrolyte was prepared by mixing 2 g polyvinyl alcohol (PVA) and 4.25 g of LiCl in 20 mL DI water at 85 °C with stirring into a homogeneous, clear and sticky gel solution. Two pieces of identical p-PPy/Cu-CAT electrodes were immersed into the above solution and then lifted up. Symmetrical two electrodes were allowed to assemble into a flexible supercapacitor device. The PVA/LiCl gel was acted as both the electrolyte and separator. Furthermore, to avoid moisture from the air, Paramembrane® was used to seal the supercapacitor device.

***Characterizations.*** SEM and EDX were performed with a field-emission scanning electron microscope (FESEM, Nova NanoSEM 450) at an accelerating voltage of 10 kV. XRD patterns is conducted on a PANalytical B.V. x'pert3 powder X-ray diffractometer with Cu K $\alpha$  radiation ( $\lambda = 1.5405 \text{ \AA}$ ) at 30 kV and 20 mA from 3° to 30° with a scanning increment of 0.02°. TEM and high-resolution TEM images were obtained with a Tecnai G2 20 scope at an acceleration voltage of 200 kV. N<sub>2</sub> adsorptions experiments were measured on a Quantachrome Autosorb-1 automatic volumetric instrument. A liquid nitrogen bath (77 K) was used for isotherm measurements. Ultra-high purity grade N<sub>2</sub> was used to the adsorption experiments. XPS spectra was collected by a monochromatic Al-K $\alpha$  X-ray source ( $h\nu = 1486.6 \text{ eV}$ , Kratos, AXIS-ULTRA DLD-600W). Thermogravimetric analysis (TGA) was performed on a Pyris 1 TGA (PerkinElmer Instruments) under air atmosphere at a heating rate of 5 °C min<sup>-1</sup>. Infrared Spectroscopy (IR) was conducted on Equinox55 equipment.

***Electrochemical measurements.*** The electrochemical performance of these electrodes was studied in a three-electrode cell in 3 M KCl aqueous electrolytes with Ag/AgCl and Pt plate as the reference electrode

and counter electrode, respectively. All electrochemical measurements were performed on a CHI 660E electrochemical workstation. The gravimetric and areal capacitances were calculated using the following equations (1) to (4). Electrochemical performance of assembled flexible supercapacitor device were tested in a two-electrode configuration and the areal energy ( $E$ ) and power densities ( $P$ ) were calculated using the following equations (5) to (6). The LED light used in the test was a cap-shape red LED lamp bead with a diameter of 5 mm, whose working potential is 1.8-2.2 V, working current is 15-20 mA, and rated power is 0.04 W.

Gravimetric capacitance

$$C_m(\text{F g}^{-1}) = \int \frac{I_1 dU}{2vmU} \quad (1)$$

$$C_m(\text{F g}^{-1}) = \frac{I_2 t}{mU} \quad (2)$$

Areal capacitance

$$C_s(\text{F cm}^{-2}) = \int I_1 dU / 2vSU \quad (3)$$

$$C_s(\text{F cm}^{-2}) = I_2 t / SU \quad (4)$$

where  $I_1$  (A) is the response current of CV,  $U$  (V) is voltage window (voltage drop IR drop has been considered for galvanostatic charging/discharging),  $v$  (V s<sup>-1</sup>) is the scan rate,  $I_2$  (A) is the discharging current,  $t$  (s) is the discharging time, and  $m$  (g) and  $S$  (cm<sup>2</sup>) are the weight and area of the electrode or the supercapacitor device.

$$E = \frac{CU^2}{(2 \times 3600)} \quad (5)$$

$$P = E \times \frac{3600}{t} \quad (6)$$

## ■ Supplementary Figures

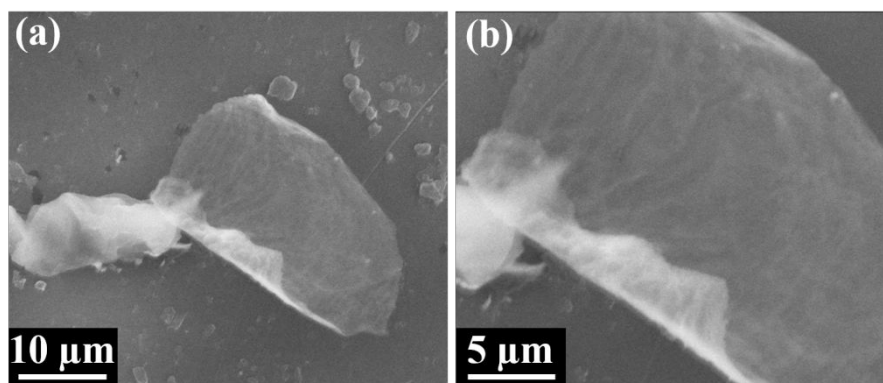

**Figure S1.** (a, b) SEM images of different multiples for PFTA template. (The PFTA solution in ethanol/ $\text{H}_2\text{O}$  was dripped onto a piece of silicon slice and then dried for the SEM characterization of PFTA template.)

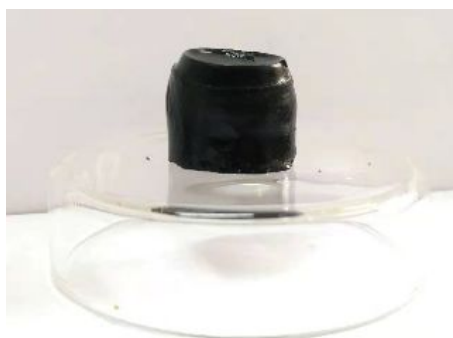

**Figure S2.** Photograph of PPy/PFTA hydrogel.

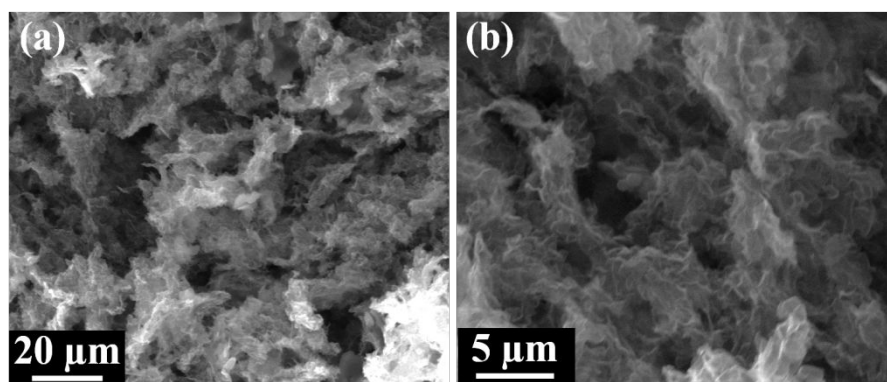

**Figure S3.** (a, b) SEM images of different multiples for PPy/PFTA hydrogel.

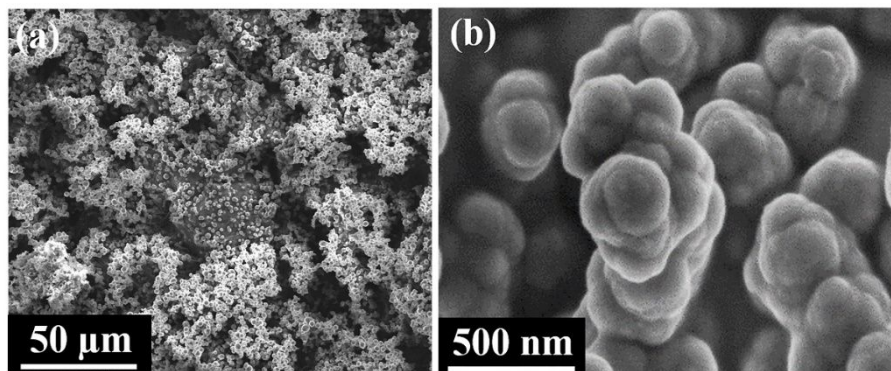

**Figure S4.** (a, b) SEM images of different multiples for typical PPy without PFTA template.

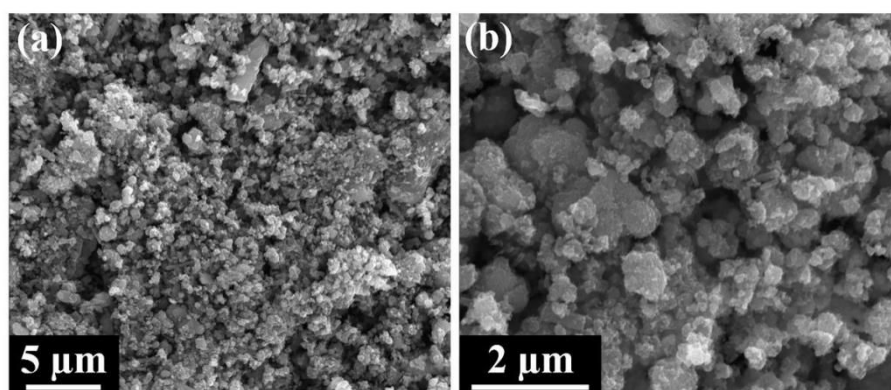

**Figure S5.** (a, b) SEM images of different multiples for Cu-CAT particles synthesized without p-PPy.

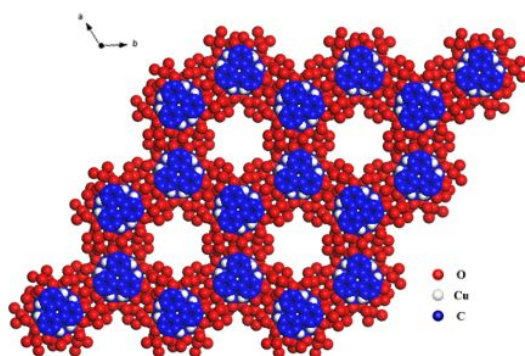

**Figure S6.** Simulated crystal structure of Cu-CAT.

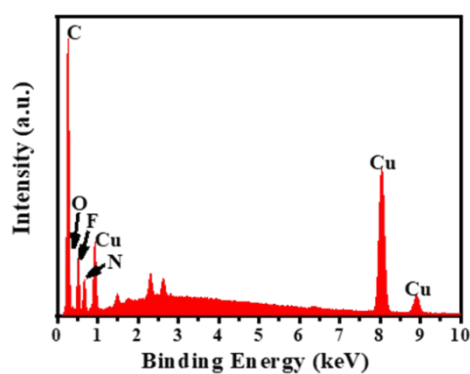

**Figure S7.** Energy dispersive X-ray (EDX) spectroscopy of p-PPy/Cu-CAT.

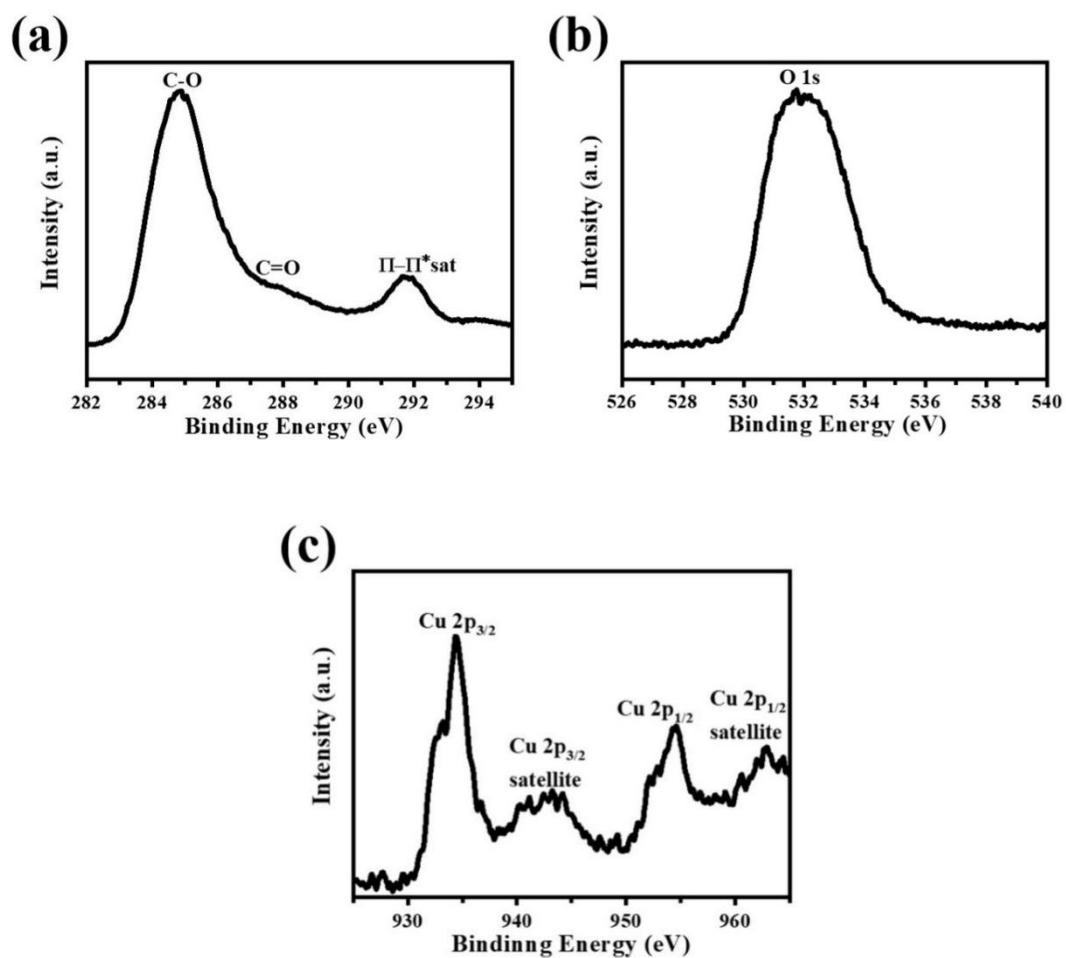

**Figure S8.** XPS spectra of (a) C 1s, (b) O 1s and (c) Cu 2p of p-PPy/Cu-CAT.

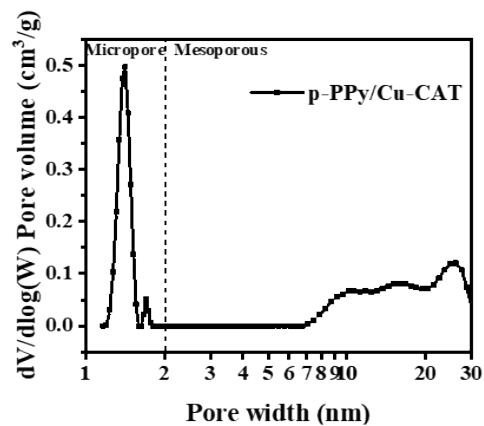

**Figure S9.** Pore-size distribution of p-PPy/Cu-CAT.

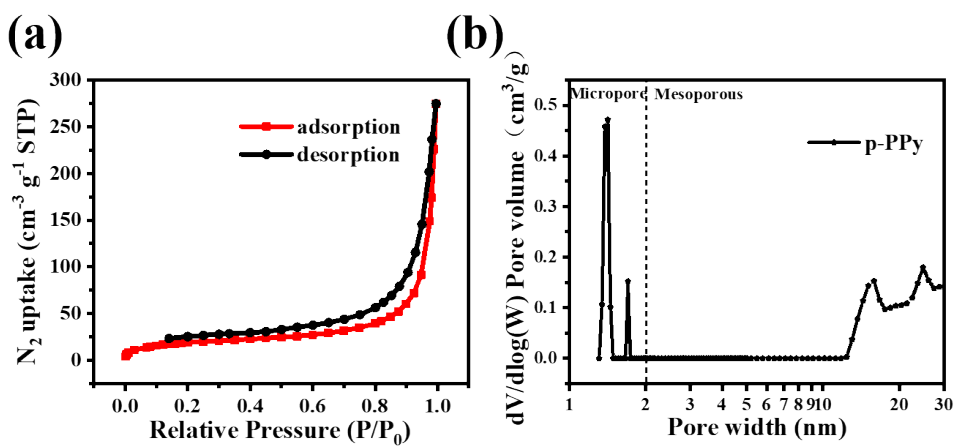

**Figure S10.** (a)  $N_2$  sorption isotherms and (b) pore-size distribution of p-PPy.

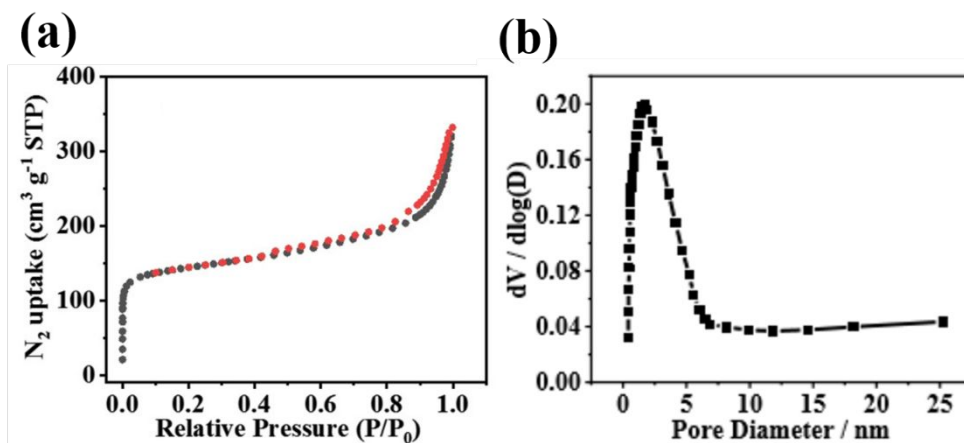

**Figure S11.** (a)  $N_2$  sorption isotherms and (b) pore-size distribution of Cu-CAT nanowires.<sup>3</sup>



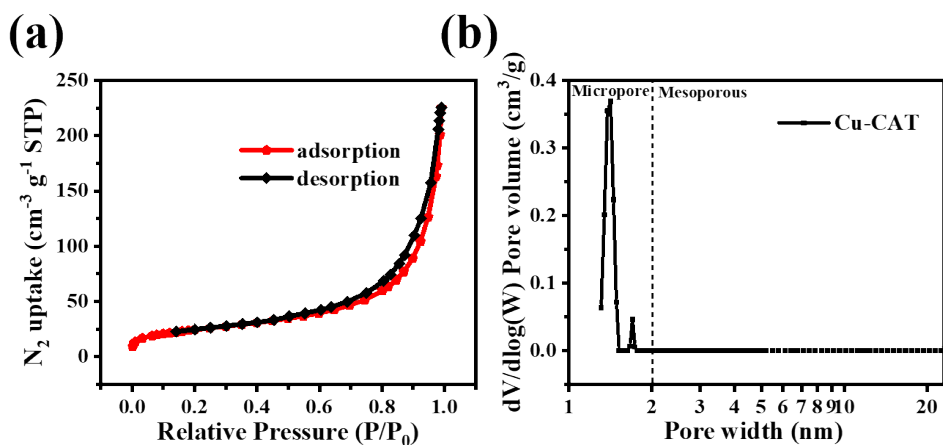

**Figure S12.** (a)  $N_2$  sorption isotherms and (b) pore-size distribution of Cu-CAT particles.

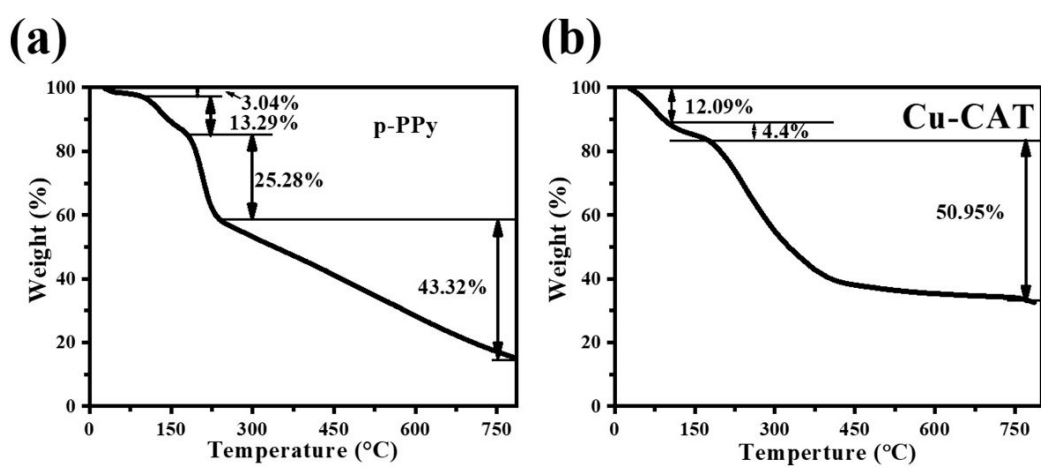

**Figure S13.** Thermal gravimetric analysis of (a) p-PPy and (b) Cu-CAT.

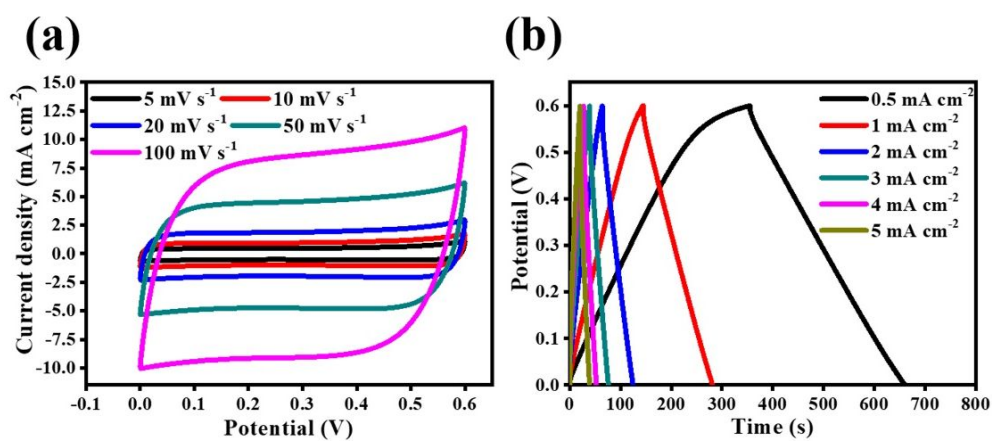

**Figure S14.** (a) CV at various scan rates and (b) GCD at diverse current densities of single p-PPy.

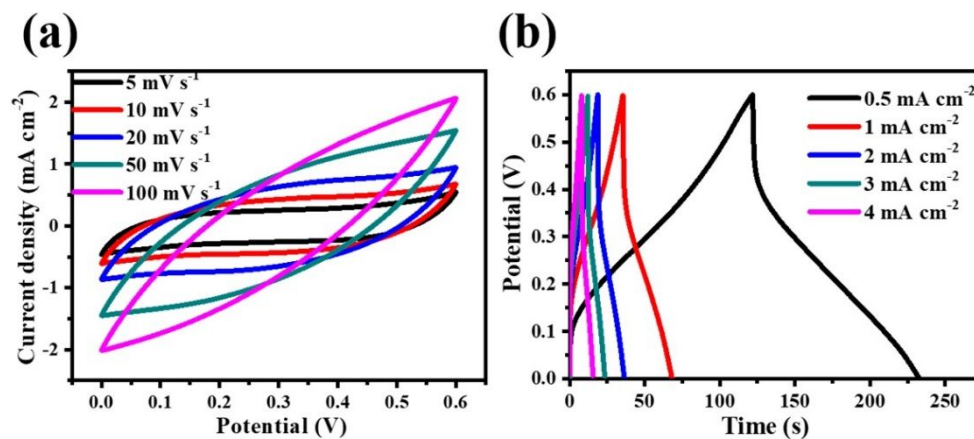

**Figure S15.** (a) CV at various scan rates and (b) GCD at diverse current densities of single Cu-CAT.

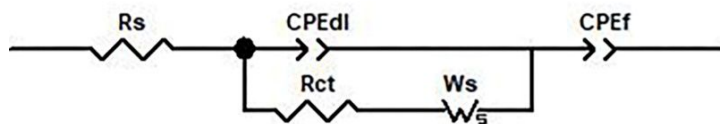

**Figure S16.** Equivalent circuit of the electrodes.  $R_s$  is electrolyte resistance;  $CPE_{dl}$  is electrical double-layer capacitance;  $R_{ct}$  is charge transfer resistance;  $W_s$  is Warburg diffusion process;  $CPE_f$  is pseudocapacitance.

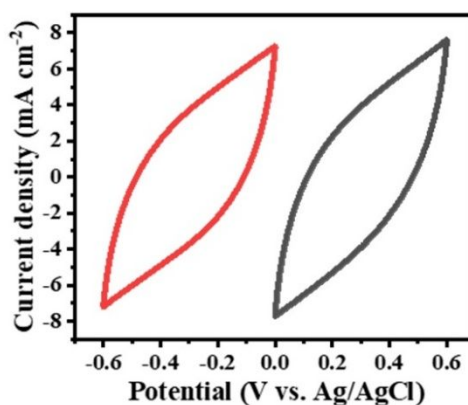

**Figure S17.** CV curves collected over diverse potentials of p-PPy/Cu-CAT electrode in a three-electrode system at a scan rate of 10 mV s<sup>-1</sup>.

**Table S1.** Typical results for some MOFs and MOF-conducting polymer hybrids based supercapacitors.

| Supercapacitor                      | Specific capacitance (mF cm <sup>-2</sup> ) | Scan rate / Current density | Energy density (μWh cm <sup>-2</sup> ) | Power density (mW cm <sup>-2</sup> ) | Specific surface area (m <sup>2</sup> g <sup>-1</sup> ) | Ref. |
|-------------------------------------|---------------------------------------------|-----------------------------|----------------------------------------|--------------------------------------|---------------------------------------------------------|------|
| Ni <sub>3</sub> (HITP) <sub>2</sub> | 15.69                                       | 0.10 mA cm <sup>-2</sup>    | 48.8                                   | 45.54                                | -                                                       | 4    |
| Cu-CAT NWAs                         | 0.022                                       | 0.5 A g <sup>-1</sup>       | 2.6 (W h kg <sup>-1</sup> )            | 0.2 (kW kg <sup>-1</sup> )           | 540                                                     | 5    |
| PEDOT-GO/U iO-66                    | 30                                          | 5 mV s <sup>-1</sup>        | 2.2                                    | 0.2                                  | 623 (UiO-66)                                            | 6    |
| PANI-ZIF-67-CC                      | 35                                          | 0.05 mA cm <sup>-2</sup>    | 16.1                                   | 245                                  | 73                                                      | 7    |
| CC/ZIF-67/PPy                       | 180.7                                       | 1 mA cm <sup>-2</sup>       | -                                      | -                                    | -                                                       | 8    |
| CFs@UiO-66/PPY                      | 206                                         | 5 mV s <sup>-1</sup>        | 12.8                                   | 2.102                                | 125                                                     | 9    |
| ZIF-PPy-2                           | 225.8                                       | 0.4 mA cm <sup>-2</sup>     | 11.3                                   | 1.44                                 | 518.8                                                   | 10   |
| Cu-CAT-NW As/PPy                    | 252.1                                       | 1.25 mA cm <sup>-2</sup>    | 22.4                                   | 1.1                                  | 468 (Cu-CAT nanowire)                                   | 3    |
| This work                           | 233                                         | 0.5 mA cm <sup>-2</sup>     | 12                                     | 1.5                                  | 107                                                     | -    |

## ■ References

- (1) Liu, S.; Wang, F.; Dong, R.; Zhang, T.; Zhang, J.; Zheng, Z.; Mai, Y.; Feng, X. Soft - template construction of 3D macroporous polypyrrole scaffolds. *small* **2017**, *13* (14), 1604099.
- (2) Hmadeh, M.; Lu, Z.; Liu, Z.; Gándara, F.; Furukawa, H.; Wan, S.; Augustyn, V.; Chang, R.; Liao, L.; Zhou, F. New porous crystals of extended metal-catecholates. *Chemistry of Materials* **2012**, *24* (18), 3511-3513.
- (3) Hou, R.; Miao, M.; Wang, Q.; Yue, T.; Liu, H.; Park, H. S.; Qi, K.; Xia, B. Y. Integrated Conductive Hybrid Architecture of Metal - Organic Framework Nanowire Array on Polypyrrole Membrane for All - Solid - State Flexible Supercapacitors. *Advanced Energy Materials* **2019**, *10* (1), 1901892, DOI: 10.1002/aenm.201901892.
- (4) Nguyen, D. K.; Schepisi, I. M.; Amir, F. Z. Extraordinary cycling stability of Ni<sub>3</sub>(HITP)<sub>2</sub> supercapacitors fabricated by electrophoretic deposition: Cycling at 100,000 cycles. *Chemical Engineering Journal* **2019**, *378*, 122150, DOI: <https://doi.org/10.1016/j.cej.2019.122150>.
- (5) Li, W.-H.; Ding, K.; Tian, H.-R.; Yao, M.-S.; Nath, B.; Deng, W.-H.; Wang, Y.; Xu, G. Conductive Metal-Organic Framework Nanowire Array Electrodes for High-Performance Solid-State Supercapacitors. *Advanced Functional Materials* **2017**, *27* (27), 1702067, DOI: 10.1002/adfm.201702067.
- (6) Fu, D.; Zhou, H.; Zhang, X.-M.; Han, G.; Chang, Y.; Li, H. Flexible solid-state supercapacitor of metal-organic framework coated on carbon nanotube film interconnected by electrochemically -codeposited PEDOT-GO. *ChemistrySelect* **2016**, *1* (2), 285-289, DOI: 10.1002/slct.201600084.
- (7) Wang, L.; Feng, X.; Ren, L.; Piao, Q.; Zhong, J.; Wang, Y.; Li, H.; Chen, Y.; Wang, B. Flexible solid-state supercapacitor based on a metal-organic framework interwoven by electrochemically-deposited PANI. *Journal of the*

*American Chemical Society* **2015**, *137* (15), 4920-4923.

(8) Liu, Y.; Xu, N.; Chen, W.; Wang, X.; Sun, C.; Su, Z. Supercapacitor with high cycling stability through electrochemical deposition of metal–organic frameworks/polypyrrole positive electrode. *Dalton Transactions* **2018**, *47* (38), 13472-13478, DOI: 10.1039/C8DT02740D.

(9) Qi, K.; Hou, R.; Zaman, S.; Qiu, Y.; Xia, B. Y.; Duan, H. Construction of Metal–Organic Framework/Conductive Polymer Hybrid for All-Solid-State Fabric Supercapacitor. *ACS Applied Materials & Interfaces* **2018**, *10* (21), 18021-18028, DOI: 10.1021/acsami.8b05802.

(10) Xu, X.; Tang, J.; Qian, H.; Hou, S.; Bando, Y.; Hossain, M. S. A.; Pan, L.; Yamauchi, Y. Three-Dimensional Networked Metal–Organic Frameworks with Conductive Polypyrrole Tubes for Flexible Supercapacitors. *ACS applied materials & interfaces* **2017**, *9* (44), 38737-38744.
